# Supplementary material for: P‐Glycoprotein (P‐gp)/ABCB1 plays a functional role in extravillous trophoblast (EVT) invasion and is decreased in the pre‐eclamptic placenta
Source: PubMed Central journal article supplement (PMC6201374; doi:10.1111/jcmm.13810), 2018-09-05

P-Glycoprotein (P-gp) maintains villous and extravillous trophoblast populations and is decreased in the preeclamptic placenta  
 Caroline E. Dunk\*, Jane J. Pappas, Phetcharawan Lye, Mark Kibschull, Mohsen Javam, Enrrico Bloise, Stephen J. Lye, Moshe Szyf  
 and Stephen G. Matthews.

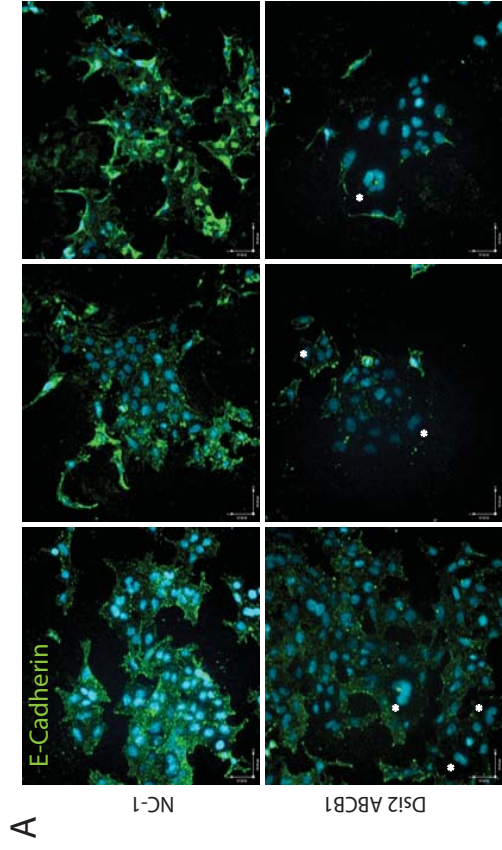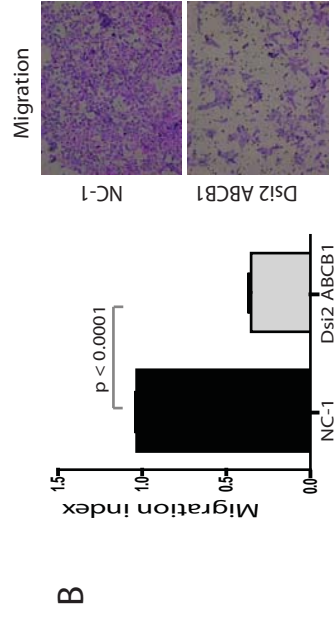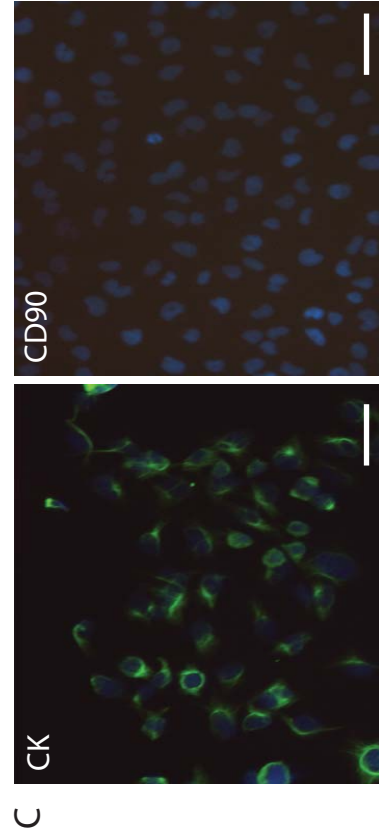

Supplement: JCMM-22-5378-s001.pdf [file JCMM-22-5378-s001.pdf]
